# Supplementary material for: Extending the ‘one-point method’ for estimations of leaf photosynthetic capacity to a broader temperature range
Source: PubMed Central journal article supplement (PMC9899412; doi:10.1093/jxb/erac466), 2022-11-26
Supplement: erac466_suppl_supplementary_tables_s1-s2_figures_s1-s3.pdf [file erac466_suppl_supplementary_tables_s1-s2_figures_s1-s3.pdf]

## **Supplementary Material**

### **Extending the ‘One-point method’ for estimations of leaf photosynthetic capacity to a broader temperature range**

Tony César de Sousa Oliveira<sup>1,2\*</sup>, Maquelle Neves Garcia<sup>3</sup>, Elmar Veenendaal<sup>2</sup>, Tomas Ferreira Domingues<sup>1</sup>

<sup>1</sup> FFCLRP, Department of Biology, University of São Paulo (USP), Ribeirão Preto, Brazil

<sup>2</sup> Plant Ecology and Nature Conservation, Wageningen University and Research (WUR), Wageningen, The Netherlands

<sup>3</sup> National Institute for Amazonian Research (INPA), Manaus, Brazil. E-mail

\*Correspondence: [tonycsoliveira@usp.br](mailto:tonycsoliveira@usp.br)

**Supplementary Table S1:** Data set of primary parameters and their temperature dependency used to estimate  $V'_{cmax}$  and  $R_{day}$  temperature response in of Eqns 3 and 4. Where R is the universal gas constant;  $E_{av}$ ,  $\Delta S_v$ , and  $H_{dv}$  are respectively the activation energy, as entropy and deactivation energy of  $V'_{cmax}$ , and  $E_{aR}$  is the activation energy of  $R_{day}$

| Parameter    | Units               | Values used here    |
|--------------|---------------------|---------------------|
| R            | $J mol^{-1} K^{-1}$ | 8.314 <sup>1</sup>  |
| $E_{aR}$     | $kJ mol^{-1}$       | 20700 <sup>2</sup>  |
| $E_{av}$     | $kJ mol^{-1}$       | 58550 <sup>1</sup>  |
| $\Delta S_v$ | $Jmol^{-1}K^{-1}$   | 629.26 <sup>1</sup> |
| $H_{dv}$     | $kJ mol^{-1}$       | 20000 <sup>1</sup>  |

<sup>1</sup>Kumarathunge, Medlyn and Duursma (2018)

<sup>2</sup> Kumarathunge et al (2018)

**Supplementary Table S2:** Species studied accordingly with the biome, their family, number of individuals (N curves) and curves (N curves), and temperature range curves.

| Biome   | Species                                          | Family       | N individuals | N curves | Leaf Temperature range |
|---------|--------------------------------------------------|--------------|---------------|----------|------------------------|
| Savanna |                                                  |              |               |          |                        |
|         | <i>Xylopia aromatica</i> (Lam.) Mart. LC         | Annonaceae   | 3             | 9        | 35°-43°C               |
|         | <i>Vochysia tucanorum</i> Mart                   | Vochysiaceae | 3             | 9        | 35°-43°C               |
|         | <i>Stryphnodendron adstringens</i> (Mart.)       | Fabaceae     | 3             | 9        | 35°-43°C               |
|         | <i>Qualea grandiflora</i> Mart.                  | Vochysiaceae | 6             | 18       | 35°-43°C               |
|         | <i>Qualea parviflora</i> Mart.                   | Vochysiaceae | 3             | 9        | 35°-43°C               |
|         | <i>Ormosia arborea</i> (Vell.) Harms Coronheira  | Fabaceae     | 3             | 9        | 35°-43°C               |
|         | <i>Hymenaea stigonocarpa</i> Mart. ex Hayne      | Fabaceae     | 6             | 18       | 35°-43°C               |
|         | <i>Annona coriacea</i> Mart.                     | Annonaceae   | 6             | 18       | 35°-43°C               |
|         | <i>Vatairea macrocarpa</i> (Benth.) Ducke        | Fabaceae     | 3             | 9        | 35°-43°C               |
|         | <i>Stryphnodendron coreacium</i> (Mart.)         | Fabaceae     | 3             | 9        | 35°-43°C               |
|         | <i>Psidium myrsinoides</i> . O.Berg.             | Myrtaceae    | 3             | 9        | 35°-43°C               |
|         | <i>Oxandra sessiliflora</i> R.E.Fr.              | Annonaceae   | 3             | 9        | 35°-43°C               |
|         | <i>Himatanthus obovatus</i> (Muell.Arg.) Woodson | Apocynaceae  | 3             | 9        | 35°-43°C               |

|          |                                                 |                  |   |   |          |
|----------|-------------------------------------------------|------------------|---|---|----------|
| Amazonia | <i>Caryocar coriaceum</i> Wittm. LC             | Caryocaraceae    | 3 | 9 | 35°-43°C |
|          | <i>Pterandra arborea</i> Ducke                  | Malpighiaceae    | 1 | 5 | 25°-45°C |
|          | <i>Licania coriacea</i> Benth                   | Chrysobalanaceae | 1 | 5 | 25°-45°C |
|          | <i>Vantanea parviflora</i> Lam                  | Humiriaceae      | 1 | 8 | 25°-45°C |
|          | <i>Pouteria erythrochrysa</i> T.D.Penn          | Sapotaceae       | 1 | 5 | 25°-45°C |
|          | <i>Diploon cuspidatum</i> (Hoehne) Cronquist    | Sapotaceae       | 1 | 5 | 25°-45°C |
|          | <i>Matayba purgans</i> Radlk.                   | Sapindaceae      | 1 | 5 | 25°-45°C |
|          | <i>Pourouma tomentosa</i> C.Mart. ex Miq        | Urticaceae       | 1 | 5 | 30°-45°C |
|          | <i>Pouteria minima</i> T.D.Penn                 | Sapotaceae       | 1 | 6 | 25°-45°C |
|          | <i>Ocotea cernua</i> (Nees) Mez                 | Lauraceae        | 1 | 5 | 25°-45°C |
|          | <i>Protium ferrugineum</i> (Engl.) Engl         | Burseraceae      | 1 | 5 | 25°-45°C |
|          | <i>Eschweilera coriacea</i> (DC.) S. A          | Lecythidaceae    | 1 | 4 | 30°-45°C |
|          | <i>Pouteria caimito</i> (Ruiz et Pavon) Radlk.  | Sapotaceae       | 1 | 5 | 25°-45°C |
|          | <i>Sloanea fragrans</i> Rusby                   | Elaeocarpaceae   | 1 | 6 | 25°-45°C |
|          | <i>Mabea angularis</i> Hollander                | Euphorbiaceae    | 1 | 5 | 25°-45°C |
|          | <i>Eschweilera grandiflora</i> (Aubl.) Sandwith | Lecythidaceae    | 1 | 5 | 25°-45°C |

---

---

|                                                             |             |   |   |          |
|-------------------------------------------------------------|-------------|---|---|----------|
| <i>Pouteria platyphylla</i> (A.C.Sm.) Baehni                | Sapotaceae  | 1 | 5 | 25°-45°C |
| <i>Duguetia stelechantha</i> (Diels) REFr.                  | Annonaceae  | 1 | 5 | 25°-45°C |
| <i>Protium hebetatum</i> Daly                               | Burseraceae | 1 | 5 | 25°-45°C |
| <i>Cordia myrciifolia</i> (K.Schum.) C.H.Perss. & Delprete. | Rubiaceae   | 1 | 5 | 25°-45°C |

---

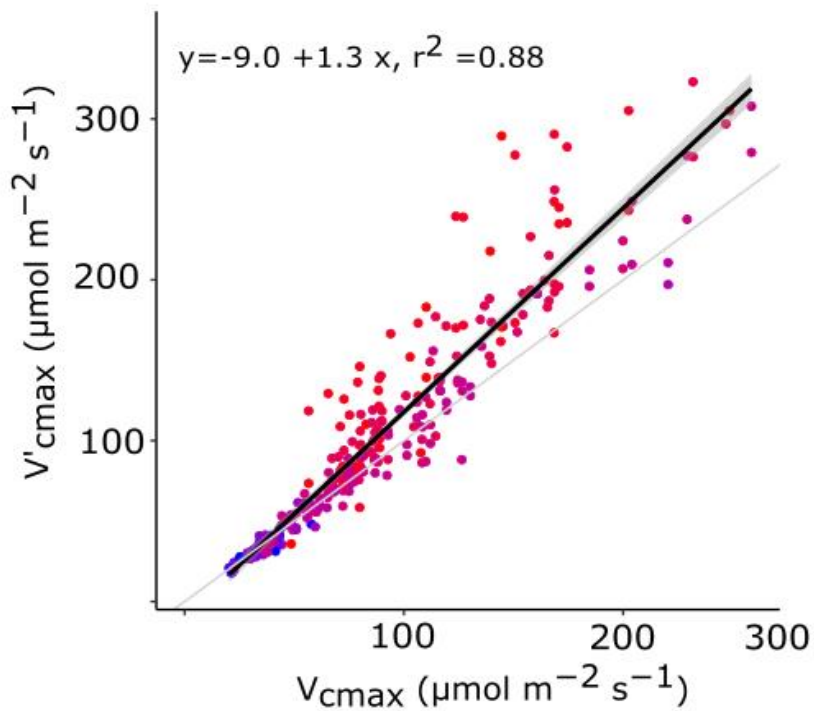

**Supplementary Figure S1:** Comparison of linear regression models between  $V_{cmax}$  estimated from full  $A-C_i$  curves against apparent photosynthetic capacity estimated by the “One-point method” ( $V'_{cmax}$  - Eqn 2), using the temperature-dependent  $Q_{10}$  using the equation:  $R_{day}^T/R_{day}^R = R_{25} * Q_{10}^{\left(\frac{T-25}{10}\right)}$  as the numerator in Eqn 5, where  $R_{25}$  represents the respiratory rates at 25 °C, T is the leaf temperature and  $Q_{10}$  represents the factor by which the respiratory rate changes with a 10 °C increase in temperature (Atkin et al 2015). The light-gray line is the 1:1 relationship.

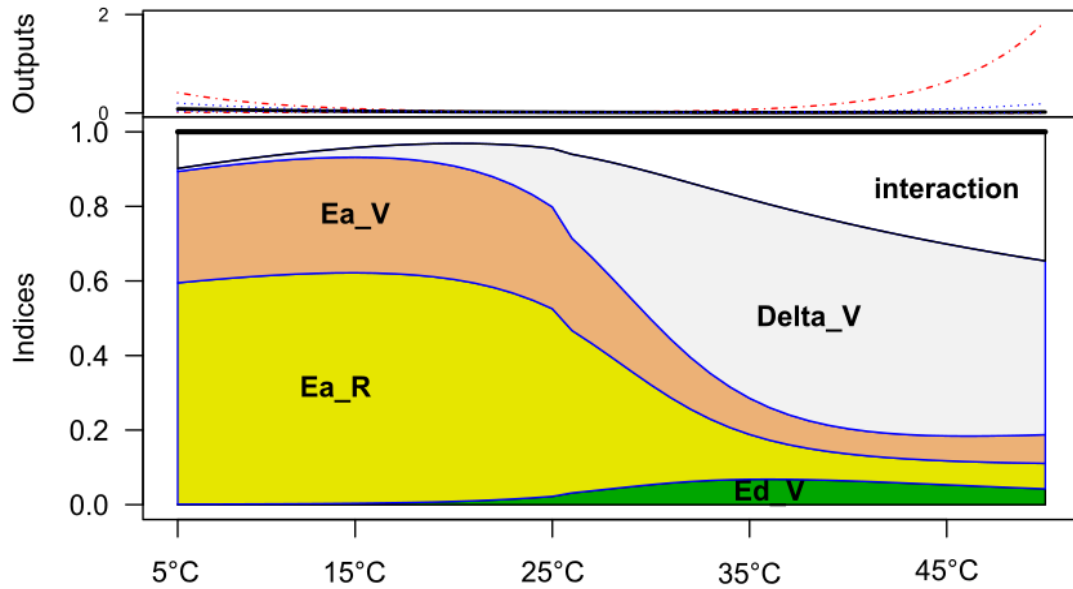

**Supplementary Figure S2:** Normalized partitioning of the variation of the influence of individual coefficients over model output at a broad leaf temperature range (sensitivity analysis). Extreme, inter-quartile, and median values are depicted by the dotted line, gray area, and bold line in the upper panel. Where,  $Ea_V$ ,  $\Delta S_V$ , and  $H_{dV}$  are respectively the activation energy, as entropy and deactivation energy of  $V'_{max}$ , and  $Ea_R$  is the activation energy of  $R_{day}$

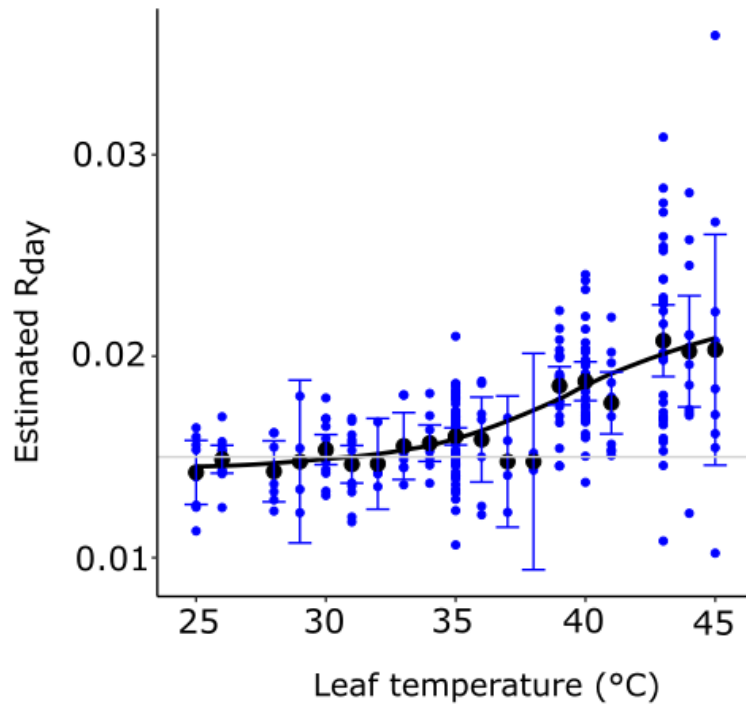

**Supplementary Figure S3:** Estimated  $R_{\text{day}}$  ( $R_{\text{day}}: V_{\text{cmax}}$  ratio) as a function of leaf temperature using the De Kauwe et al. (2015) model. We derived  $R_{\text{day}}: V_{\text{cmax}}$  ratio by fitting a nonlinear regression model using the 'nlsLM' function from the 'minpack.lm' package. The light-gray line is the fixed estimated  $R_{\text{day}}: V_{\text{cmax}}$  value (0.015).



## References

- Atkin OK, Bloomfield KJ, Reich PB, *et al.*** 2015. Global variability in leaf respiration in relation to climate, plant functional types and leaf traits. *New Phytologist*, **206**, 614–636.
- De Kauwe, MG, Lin YS, Wright IJ, *et al.*** 2016. A test of the “one-point method” for estimating maximum carboxylation capacity from field-measured, light-saturated photosynthesis. *New Phytologist*, **210**, 1130–1144.
- Kumarathunge DP, Medlyn BE, Drake JE, *et al.*** 2019. Acclimation and adaptation components of the temperature dependence of plant photosynthesis at the global scale. *New Phytologist*, **22**, 768–784.
- Kumarathunge DP, Medlyn BE, Duursma R.** 2018. New temperature responses of  $V_{\text{cmax}}$  and  $J_{\text{max}}$ . [https://remkoduursma.github.io/plantecophys/articles/new\\_T\\_responses.html](https://remkoduursma.github.io/plantecophys/articles/new_T_responses.html). Accessed July 2022.
